# Supplementary material for: Insights into the electrooptical anion sensing properties of a new organic receptor: solvent dependent chromogenic response and DFT studies
Source: Royal Society of Chemistry journal article supplement (doi:10.1039/c6ra16197a), 2016-01-01
Supplement: c6ra16197a1.pdf [file c6ra16197a1.pdf]

## Supporting Information

### **Insights into the electrooptical anion sensing properties of a new organic receptor: Solvent dependent chromogenic response and DFT studies**

Srikala P.,<sup>a</sup> Kartick Tarafdar<sup>b</sup>, A. Nityananda Shetty<sup>c</sup> and Darshak R. Trivedi<sup>a\*</sup>

*<sup>a</sup>Supramolecular Chemistry Laboratory, National Institute of Technology Karnataka (NITK), Surathkal-575025, Karnataka, India*

*<sup>b</sup>Department of Physics, National Institute of Technology Karnataka (NITK), Surathkal-575025, Karnataka, India*

*<sup>c</sup>Department of Chemistry, National Institute of Technology Karnataka (NITK), Surathkal-575025, Karnataka, India*

*\*Author to whom correspondence should be addressed e-mail: darshak\_rtrivedi@yahoo.co.in, , Tel.: +91-824-2473205; fax: +91 824 2474033.*

## Table of contents

|    |                                                                                                                                                                                                                     |
|----|---------------------------------------------------------------------------------------------------------------------------------------------------------------------------------------------------------------------|
| 1  | Experimental section                                                                                                                                                                                                |
| 2  | <b>Fig. S1:</b> FTIR spectrum of Receptor R                                                                                                                                                                         |
| 3  | <b>Fig. S2:</b> $^1\text{H}$ -NMR spectrum of receptor R                                                                                                                                                            |
| 4  | <b>Fig. S3:</b> Mass spectrum of receptor R                                                                                                                                                                         |
| 5  | <b>Fig. S4 :</b> UV-Vis absorption spectra of R( $1 \times 10^{-4}$ in dry DMSO) upon addition of 1 eq. of TBA salts of anions                                                                                      |
| 6  | <b>Fig. S5:</b> Colour change of the receptor with the addition of 1eq.of TBA salts of anions                                                                                                                       |
| 7  | <b>Fig. S6:</b> UV-Vis absorption spectra of R(DMSO/Tris HCl (9:1 v/v, $10^{-4}\text{M}$ ) upon addition of 2 eq. of TBA salts of anions                                                                            |
| 8  | <b>Fig. S7:</b> UV-Vis titration spectra of R ( $1 \times 10^{-4}$ M in dry DMSO) with the incremental addition of standard solution of TBAAcO ( $1 \times 10^{-2}\text{M}$ in dry DMSO                             |
| 9  | <b>Fig. S8:</b> B-H plot of receptor R- TBAAcO complex in dry DMSO                                                                                                                                                  |
| 10 | <b>Fig. S9:</b> UV-Vis titration spectra of R ( $1 \times 10^{-4}$ M in dry DMSO) with the incremental addition of standard solution of TBAH <sub>2</sub> PO <sub>4</sub> ( $1 \times 10^{-2}\text{M}$ in dry DMSO) |
| 11 | <b>Fig. S10:</b> B-H plot of receptor R- TBA H <sub>2</sub> PO <sub>4</sub> complex in dry DMSO                                                                                                                     |
| 12 | <b>Fig. S11:</b> UV-Vis titration spectra of R ( $1 \times 10^{-4}$ M in dry DMSO) with the incremental addition of standard solution of TBAF ( $1 \times 10^{-2}\text{M}$ in dry DMSO)                             |
| 13 | <b>Fig. S12:</b> B-H plot of receptor R- TBAF complex in dry DMSO                                                                                                                                                   |
| 14 | <b>Fig. S13:</b> B-H plot of receptor R- TBAAcO complex in Tris HCl buffer                                                                                                                                          |
| 15 | <b>Fig. S14:</b> UV-Vis absorption spectra of receptor ( $1 \times 10^{-4}\text{M}$ ) in various polar aprotic solvents with the addition of 1 eq. of TBAAcO                                                        |
| 16 | <b>Fig. S15:</b> UV-Vis spectra of R ( $1 \times 10^{-4}$ M in THF) upon addition of 1 eq. of TBA salts of F , AcO and H <sub>2</sub> PO <sub>4</sub> ions                                                          |
| 17 | <b>Fig. S16:</b> Colour change of R ( $1 \times 10^{-4}$ M in THF) upon addition of 1 eq. of F , AcO and H <sub>2</sub> PO <sub>4</sub>                                                                             |
| 18 | <b>Fig. S17:</b> Solvatochromic effect observed with the addition of 1 eq. of TBAH <sub>2</sub> PO <sub>4</sub> to receptor solution ( $1 \times 10^{-4}$ M) in various polar aprotic solvents                      |
| 19 | <b>Fig. S18:</b> Solvatochromic effect observed with the addition of 1 eq. of TBAF to receptor solution ( $1 \times 10^{-4}$ M) in various polar aprotic solvents                                                   |
| 20 | <b>Fig. S19:</b> UV-Vis titration spectra of R( $1 \times 10^{-4}$ M, 9:1 v/v DMSO/H <sub>2</sub> O) with the incremental addition of standard solution of NaF                                                      |
| 21 | <b>Fig. S20:</b> B-H plot of receptor R- Na <sup>+</sup> F complex in aqueous media                                                                                                                                 |
| 22 | <b>Fig. S21:</b> UV-Vis titration spectra of R( $1 \times 10^{-4}$ M, 9:1 v/v DMSO/H <sub>2</sub> O) with the incremental addition of standard solution of NaAcO                                                    |
| 23 | <b>Fig. S22:</b> B-H plot of receptor R- Na <sup>+</sup> AcO complex                                                                                                                                                |
| 24 | <b>Fig. S23:</b> UV-Vis spectra of R ( $1 \times 10^{-4}$ M in DMSO) upon addition of a drop of mouthwash, seawater and vinegar                                                                                     |
| 25 | <b>Fig. S24:</b> Color change of R ( $1 \times 10^{-4}$ M in DMSO) upon addition of a drop of mouthwash, seawater and vinegar                                                                                       |
| 26 | <b>Fig. S25:</b> Color change of Receptor R upon dry grinding of receptor with 1 eq. of TBAAcO                                                                                                                      |
| 27 | <b>Fig. S26:</b> Cyclic voltammogram of Receptor R ( $5 \times 10^{-5}\text{M}$ ) with incremental addition of TBAAcO ion                                                                                           |
| 28 | <b>Fig. S27:</b> $^1\text{H}$ NMR titration of receptor R with incremental addition of TBAOH ion                                                                                                                    |
| 29 | <b>Fig. S28:</b> UV-Vis titration spectra of R( $1 \times 10^{-4}$ M, DMSO) with the incremental addition of standard solution of TBAOH ( $1 \times 10^{-2}\text{M}$ in DMSO)                                       |
| 30 | <b>Fig. S29:</b> Optimized geometry of the receptor in gas phase                                                                                                                                                    |
| 31 | <b>Fig. S30:</b> HOMO of the receptor in gas phase                                                                                                                                                                  |
| 32 | <b>Fig. S31:</b> LUMO of the receptor in gas phase                                                                                                                                                                  |
| 33 | <b>Fig. S32:</b> Optimized structure of the receptor in DMSO                                                                                                                                                        |

34 **Fig. S33:** HOMO of the receptor in DMSO  
35 **Fig. S34:** LUMO of the receptor in DMSO  
36 **Fig. S35:** Optimized structure of deprotonated receptor in acetone  
37 **Fig. S36:** HOMO of the deprotonated receptor in acetone  
38 **Fig. S37:** LUMO of the deprotonated receptor in acetone  
39 **Fig. S38:** DFT derived UV-Vis spectra of the receptor in gas phase, in solvents such as DCM and  
acetone with addition of  $\text{AcO}^-$  ion  
40 **Table S1:** Changes in absorption maxima of receptor R in various solvents upon addition of 1eq. of  
TBAAcO in dry DMSO  
41 **Table S2:** Binding ratio, binding constant and detection limit of receptor R  
42 **Table S3:** Mulliken charge distribution and spin densities derived from DFT calculations

## Experimental section:

### Materials and methods:

All the chemicals used in the present study were procured from Sigma-Aldrich and Alfa Aesar and were used as received without further purification. All the solvents were purchased from SD Fine, India, were of HPLC grade and used without further distillation.

Melting point was measured on Stuart SMP3 melting-point apparatus in open capillaries. Infrared spectrum was recorded on Bruker Apex FTIR spectrometer. UV-Vis spectroscopy was performed with analytik jena Specord S600 spectrometer in standard 3.0 mL quartz cell with 1cm path length. The  $^1\text{H}$  NMR spectra were recorded on Bruker Ascend (400 MHz) instrument using TMS as internal reference and DMSO- $\text{d}_6$  as solvent. Resonance multiplicities are described as s (singlet), d (doublet), t (triplet) and m (multiplet). Mass spectrum was recorded on Bruker Daltonics *ESI* Q TOF. Cyclic voltammogram was recorded on Ivium electrochemical workstation (Vertex) at a scan rate of 20 mV/s with the potential range 1.0 mV to -1.0 mV.

We have performed the Density Functional Theory (DFT) simulation on the receptor molecule using GAUSSIAN 09 package. A closed shell Becke–Lee–Yang–Parr hybrid exchange-correlation three-parameter functional (B3LYP)<sup>1-3</sup> along with 6-311++G(d) basis set were used in the simulation to derive a complete geometry optimization for isolated receptor and its deprotonated form in the binding process. Berny's optimization algorithm was used to fully optimize the molecular geometry, which involves redundant internal coordinates. To confirm the convergence to the minima on the potential energy surface, the harmonic vibrational wavenumbers were calculated using analytic second derivatives and properly scale down to control the systematic errors caused by incompleteness of the basis set. In a second step the time dependent DFT (TD-DFT) method were used considering the same B3LYP exchange-correlation functional with 6-311++G (d,p) basis set to obtain the UV-Visible absorption spectra of free and deprotonated receptor.

### Synthesis of (E)-1-(4-nitrobenzylidene)-2-(2,4-dinitrophenyl)hydrazine:

4-nitrobenzaldehyde (0.05 g, 0.33 mmol) and 2,4-dinitrophenylhydrazine(0.65 g, 0.33 mmol) were mixed in 5 ml ethanol. A drop of acetic acid was added and the reaction mixture was refluxed at 60°C for 5 h. The formation of the product was confirmed through TLC by the generation of single spot indicative of the disappearance of starting materials.

Yield: 85%., m. p. 280 °C.

$^1\text{H}$  NMR (DMSO-  $\text{d}_6$ , 400 MHz, ppm):  $\delta$  8.05 (s, H), 8.16 (s, H), 8.32-8.41 (m, 4H), 8.8 (s 1H), 8.86 (s, 1H), 11.85 (s 1H).

FTIR (KBr)( $\text{cm}^{-1}$ ): 3279(NH), 3089(Ar-CH), 1613(CH=N), 1510(C=C), 1331( $\text{NO}_2$ ), 1088(C-H)

Mass (ESI):  $m/z$  Calculated: 331.06 Obtained: 338(M+N<sup>+</sup>)

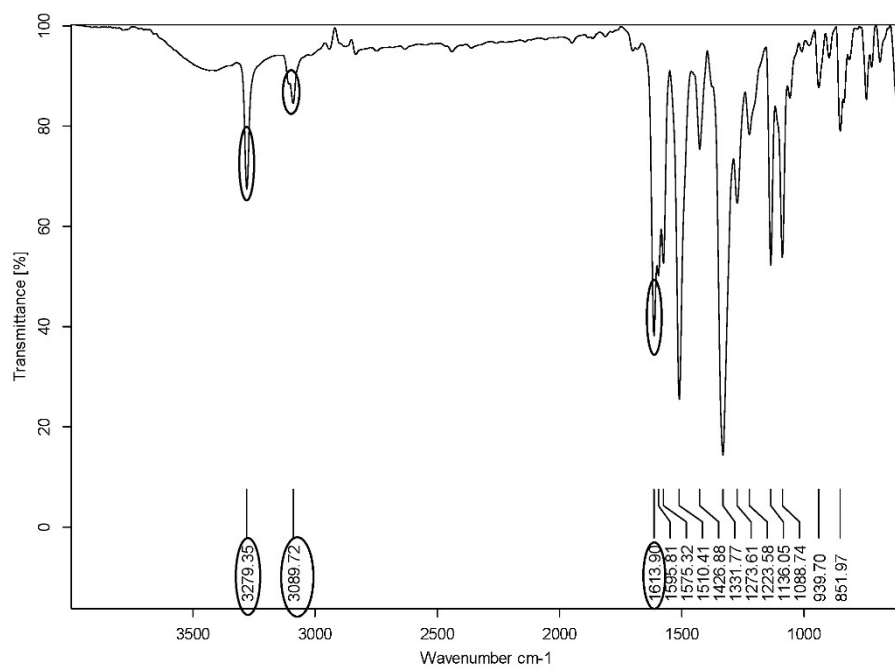

**Fig. S1:** FTIR spectrum of receptor R

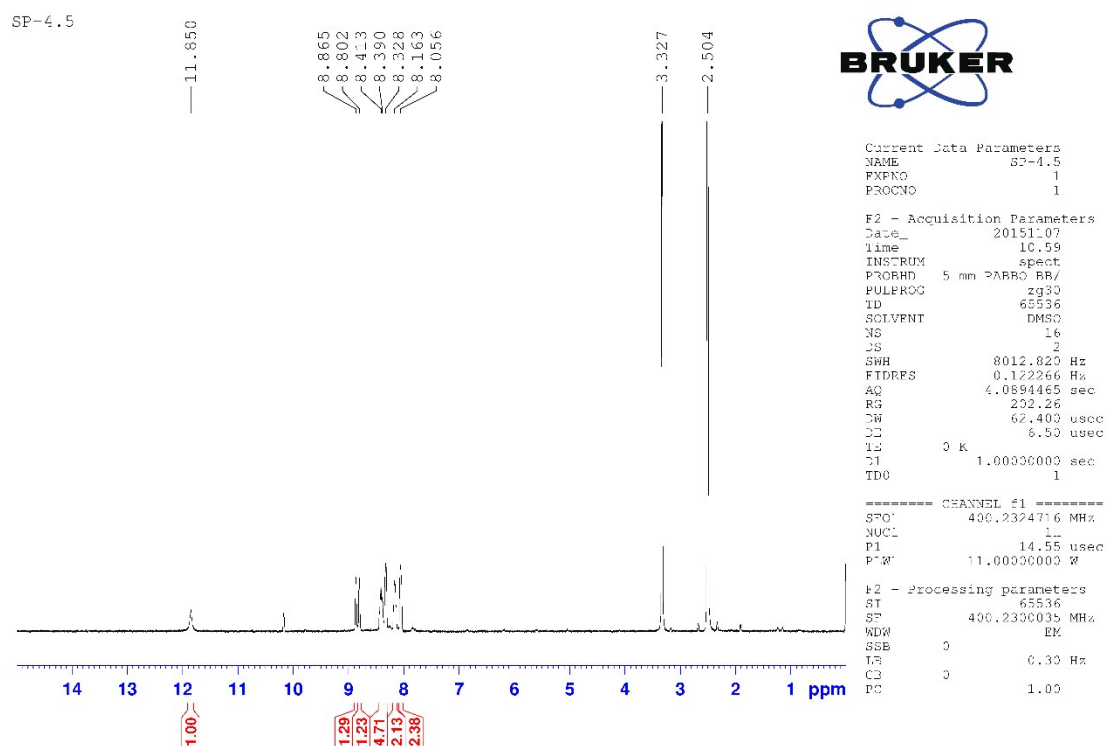

**Fig S2:**  $^1\text{H}$ -NMR spectrum of receptor R

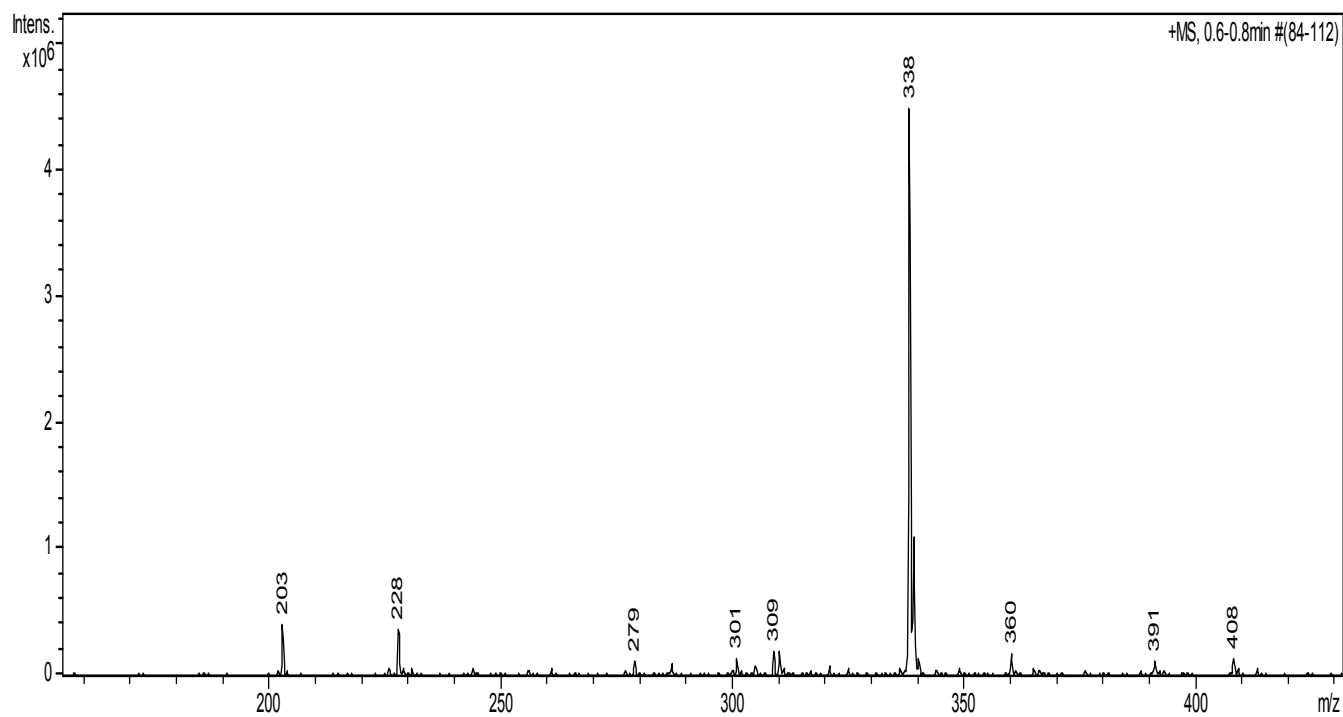

**Fig S3:** Mass spectrum of receptor R

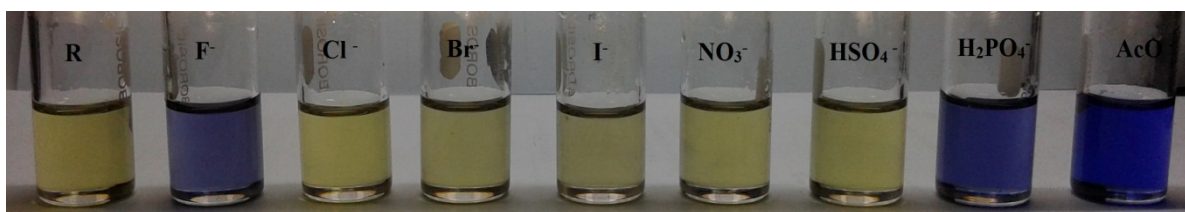

**Fig. S4:** Colour change of the receptor with the addition of 1eq. of TBA salts of anions

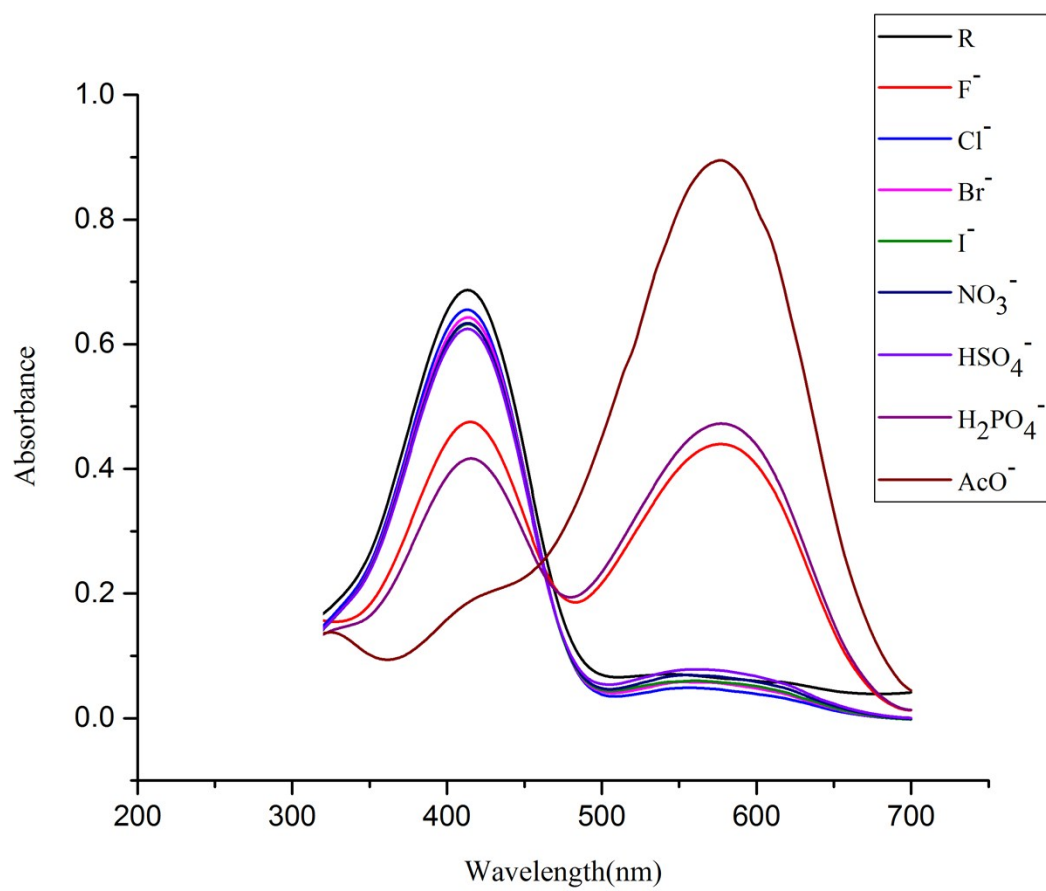

**Fig. S5:** UV-Vis absorption spectra of R( $1 \times 10^{-4}$  in dry DMSO) upon addition of 1 eq. of TBA salts of anions

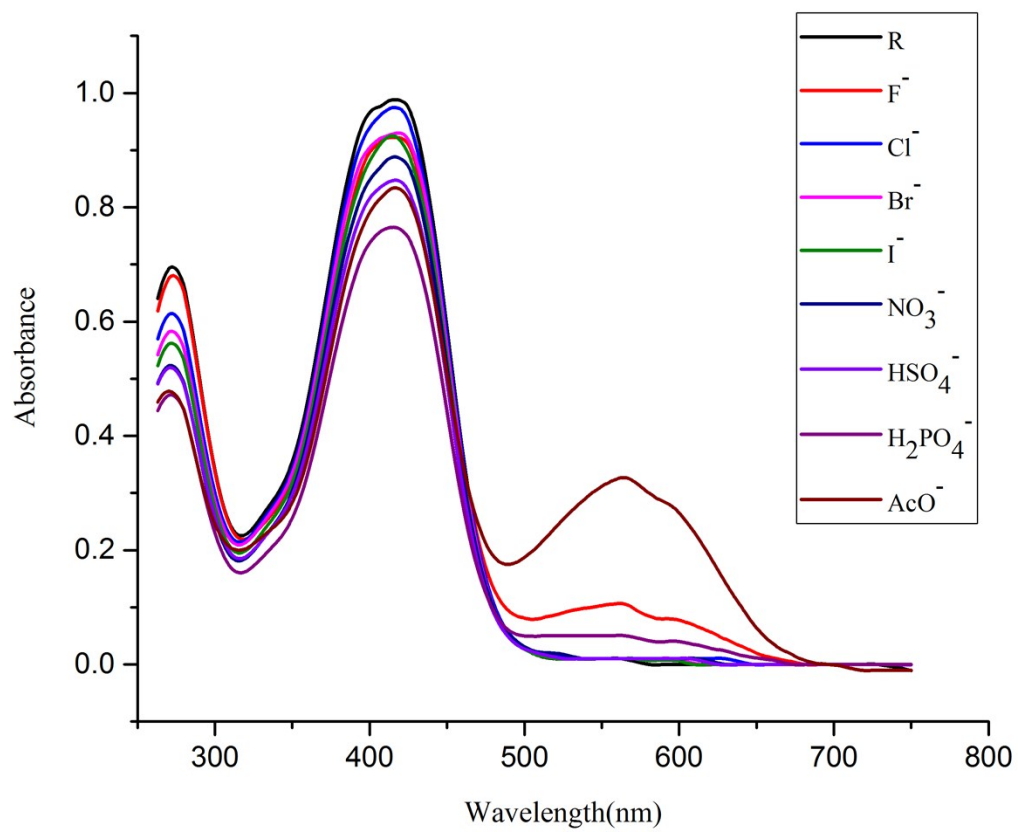

**Fig. S6:** UV-Vis absorption spectra of R (DMSO/Tris HCl (9:1 v/v,  $10^{-4}$  M) upon addition of 2 eq. of TBA salts of anions

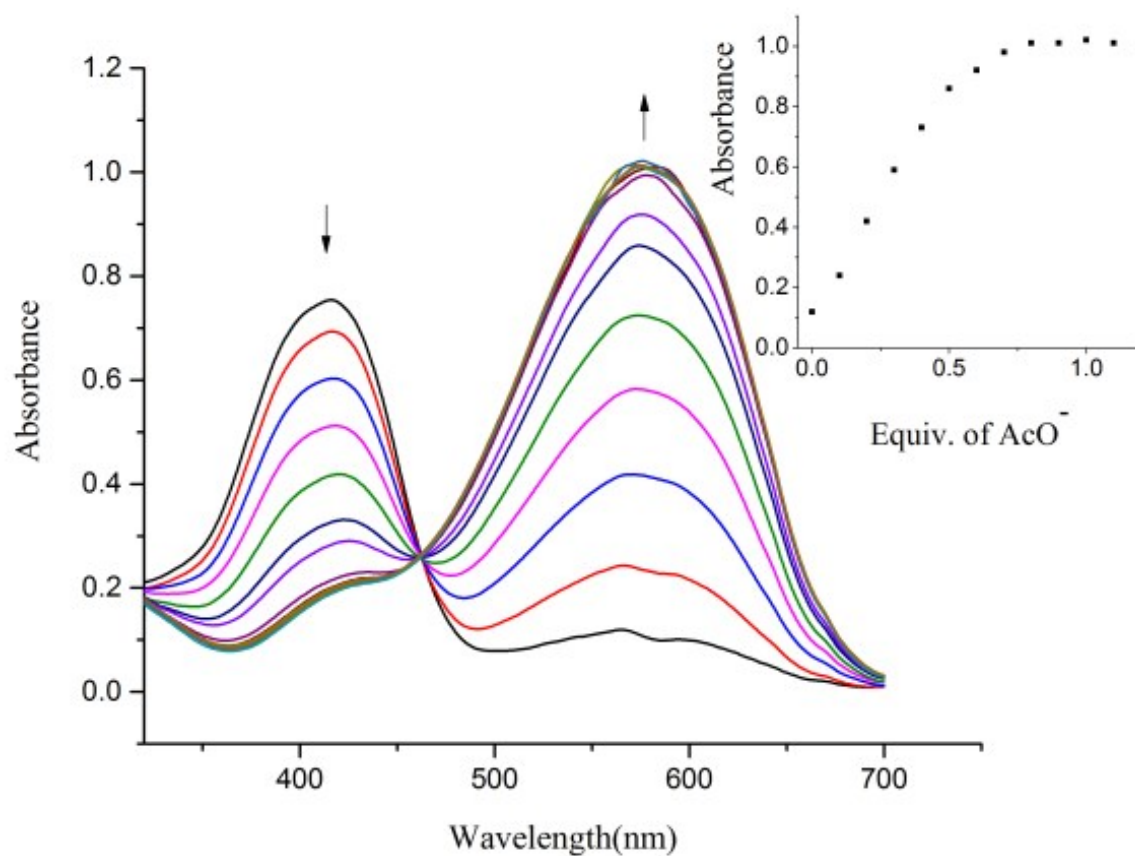

**Fig. S7:** UV-Vis titration spectra of R ( $1 \times 10^{-4}$  M in dry DMSO) with the incremental addition of standard solution of TBAAcO ( $1 \times 10^{-2}$  M in dry DMSO). Inset showing the binding isotherm at 572 nm

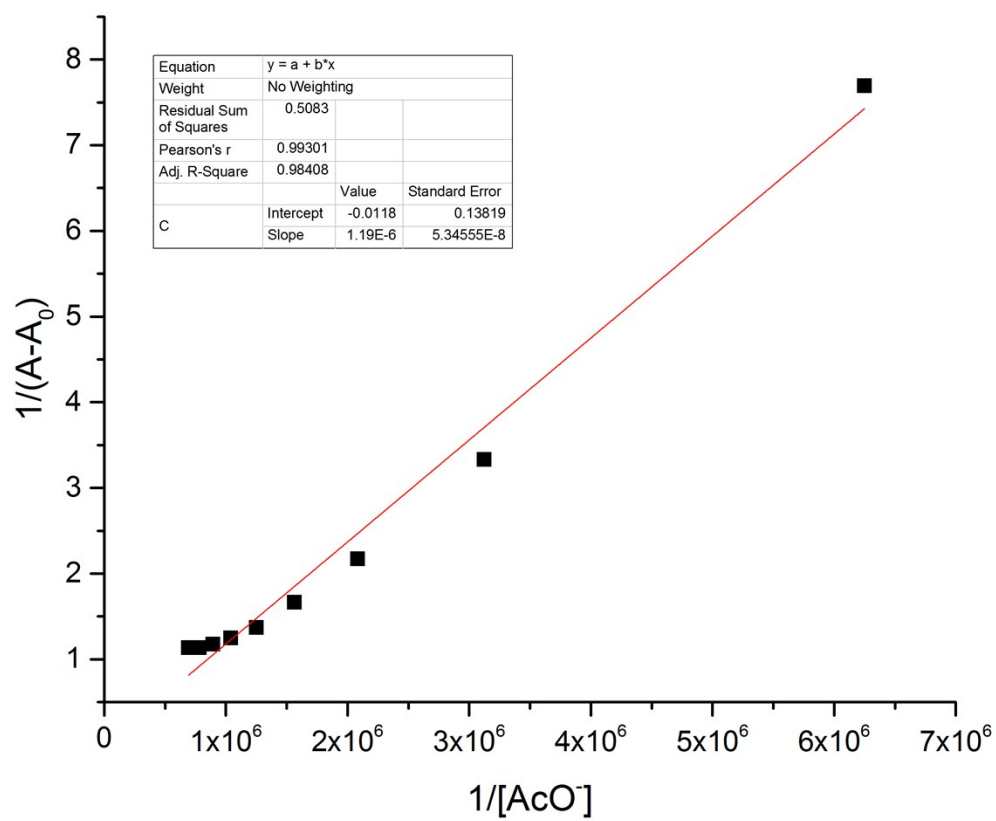

**Fig. S8:** B-H plot of receptor R- TBAAcO complex at a selected wavelength of 572 nm

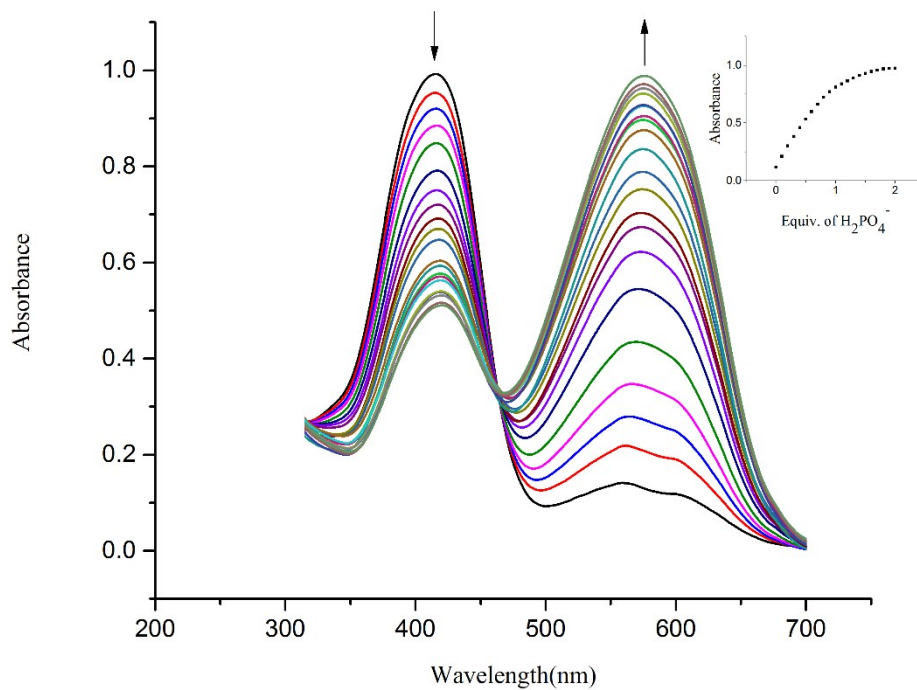

**Fig. S9:** UV-Vis titration spectra of R ( $1 \times 10^{-4}$  M in dry DMSO) with the incremental addition of standard solution of TBAH<sub>2</sub>PO<sub>4</sub> ( $1 \times 10^{-2}$  M in dry DMSO). Inset showing the binding isotherm at 572 nm

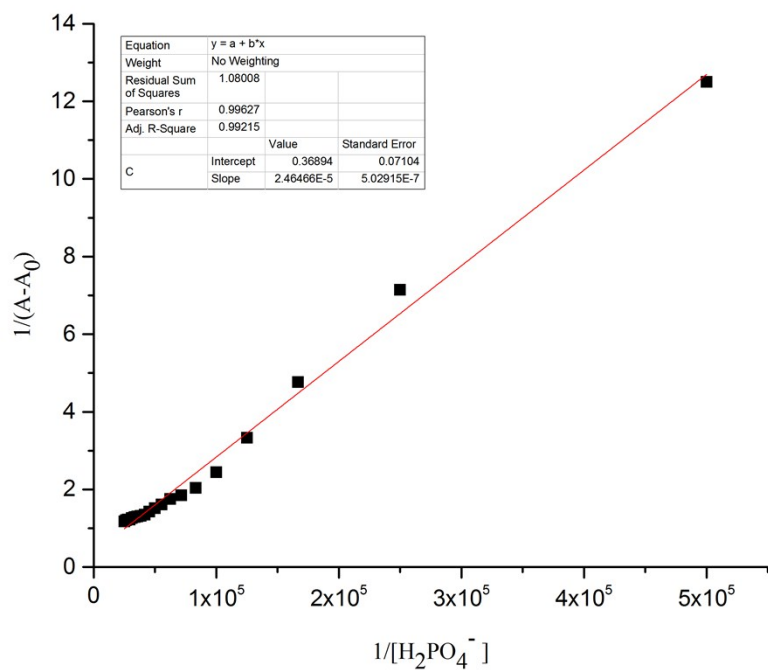

**Fig. S10:** B-H plot of receptor R- TBAH<sub>2</sub>PO<sub>4</sub> complex at a selected wavelength of 572 nm

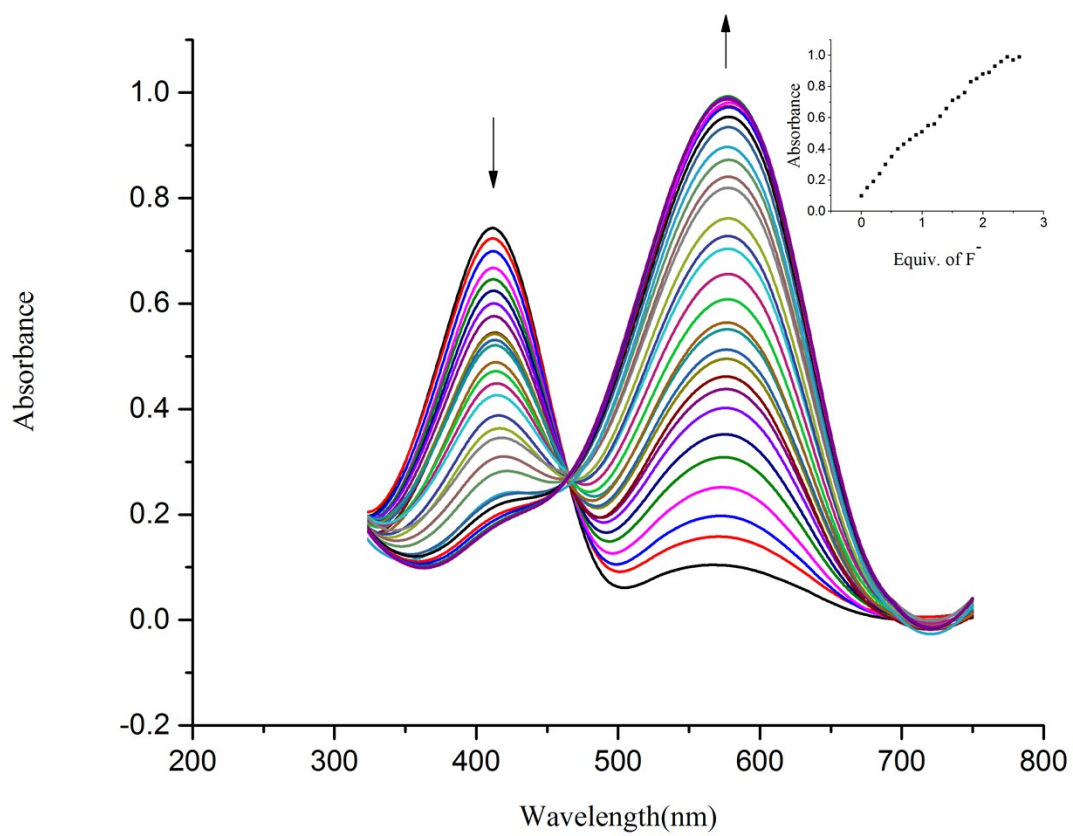

**Fig. S11:** UV-Vis titration spectra of R ( $1 \times 10^{-4}$  M in dry DMSO) with the incremental addition of standard solution of TBAF ( $1 \times 10^{-2}$  M in dry DMSO). Inset showing the binding isotherm at 578 nm

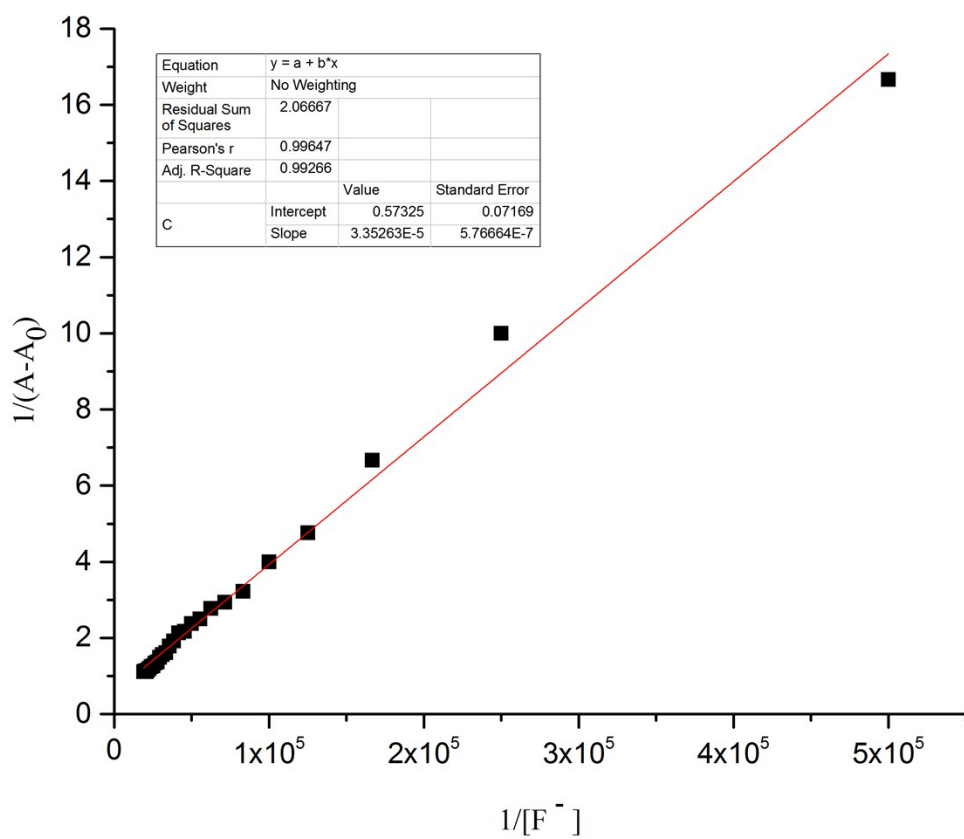

**Fig. S12:** B-H plot of receptor R- TBAF complex at a selected wavelength of 578 nm

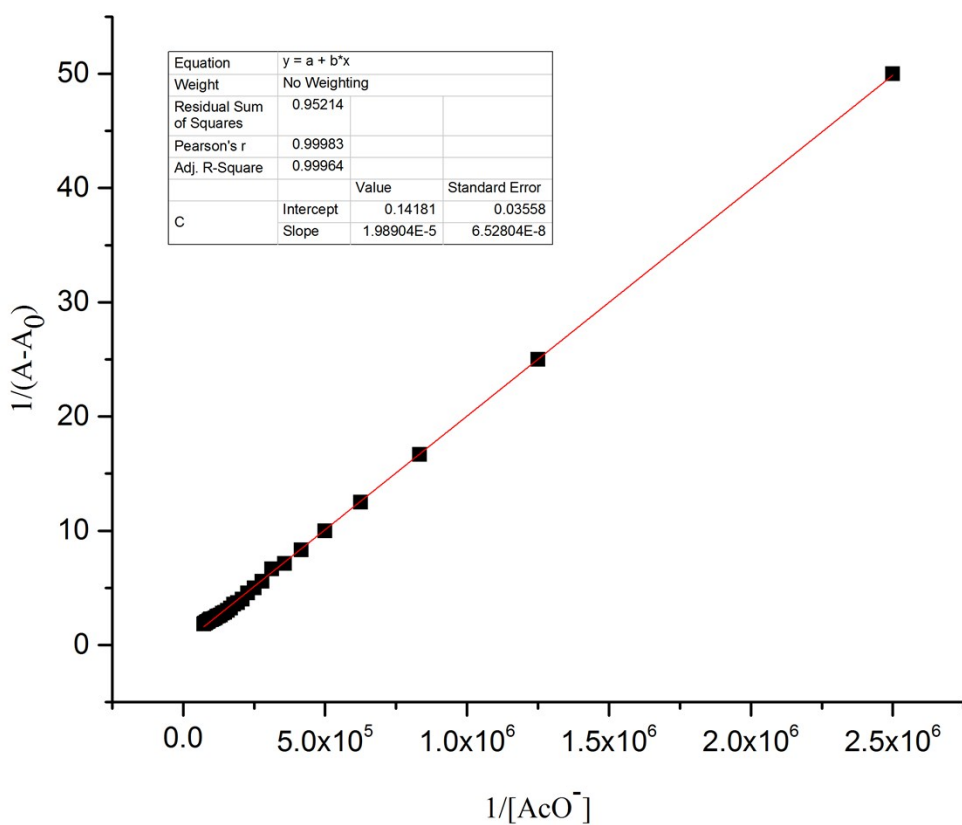

**Fig. S13:** B-H plot of receptor R- TBAAcO complex (buffer media) at a selected wavelength of 569 nm

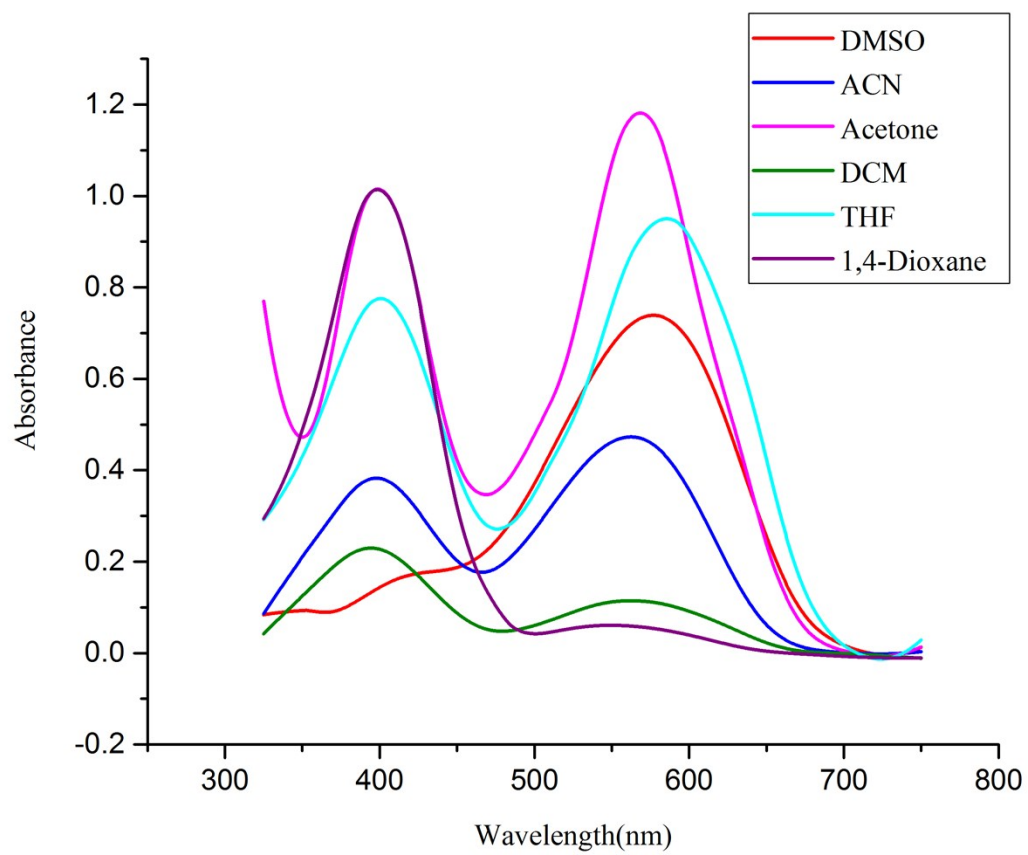

**Fig. S14:** UV-Vis absorption spectra of receptor ( $1 \times 10^{-4} \text{ M}$ ) in various polar aprotic solvents with the addition of 1 eq. of TBAAcO ( $10^{-2} \text{ M}$  in dry DMSO)

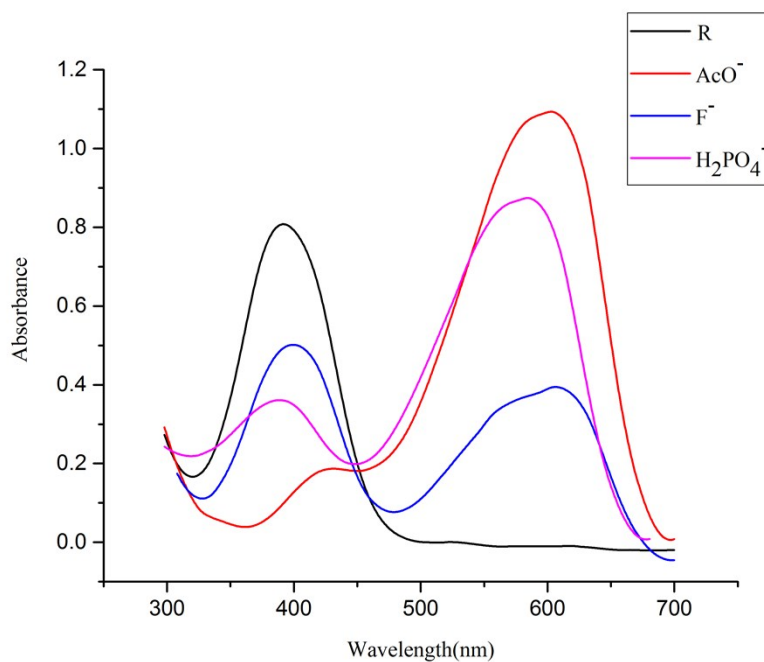

**Fig.S15:** UV-Vis spectra of R ( $1 \times 10^{-4}$  M in THF) upon addition of 1 eq. of TBA salts of F<sup>-</sup>, AcO<sup>-</sup> and H<sub>2</sub>PO<sub>4</sub><sup>-</sup> ions ( $1 \times 10^{-2}$  M in dry DMSO)

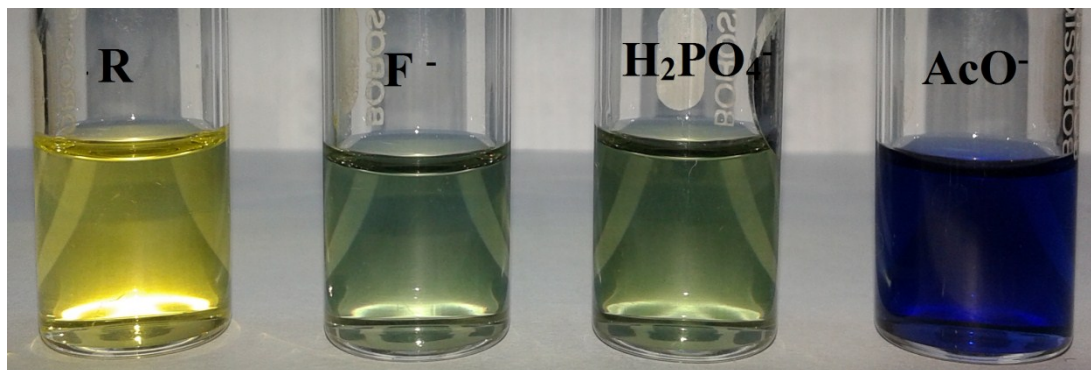

**Fig.S16:** Colour change of R ( $1 \times 10^{-4}$  M in THF) upon addition of 1 eq. of F<sup>-</sup>, AcO<sup>-</sup> and H<sub>2</sub>PO<sub>4</sub><sup>-</sup> ( $1 \times 10^{-2}$  M as TBA salts in dry DMSO)

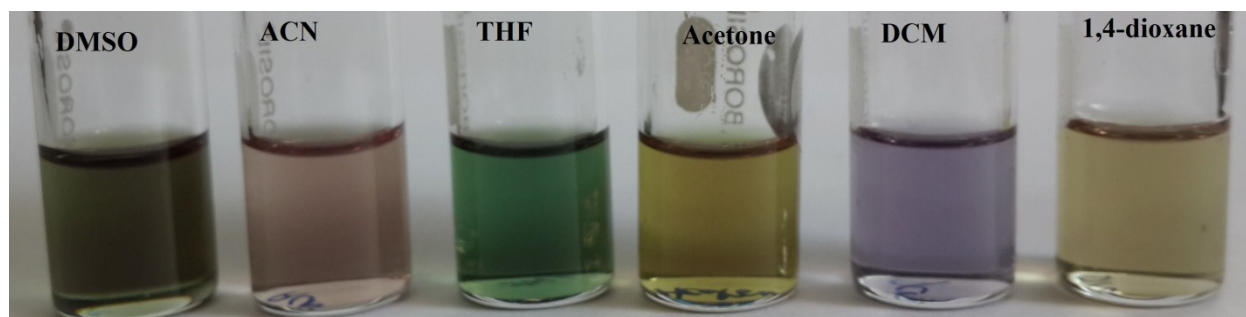

**Fig. S17:** Solvatochromic effect observed with the addition of 1 eq. of  $\text{TBAH}_2\text{PO}_4$  to receptor solution ( $1 \times 10^{-4} \text{ M}$ ) in various polar aprotic solvents

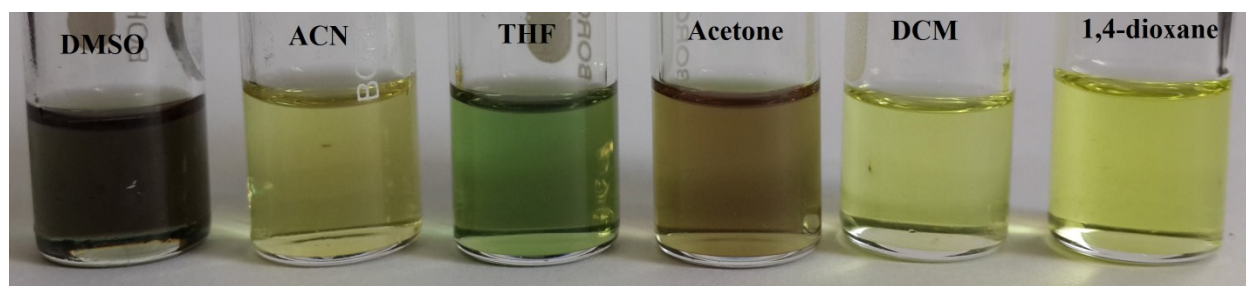

**Fig. S18:** Solvatochromic effect observed with the addition of 1 eq. of TBAF to receptor solution ( $1 \times 10^{-4} \text{ M}$ ) in various polar aprotic solvents

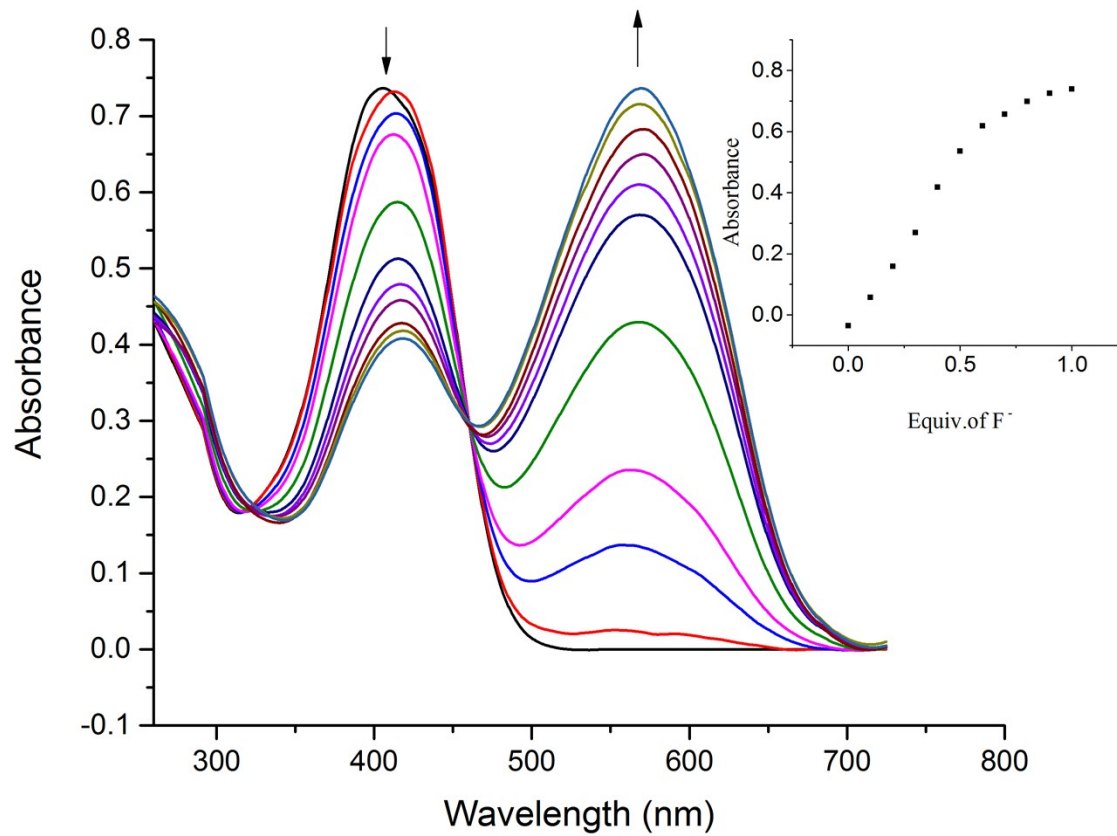

**Fig.S19:** UV-Vis titration spectra of R ( $1 \times 10^{-4}$  M, 9:1, v/v DMSO/H<sub>2</sub>O) with the incremental addition of standard solution of NaF ( $1 \times 10^{-2}$  M in distilled water). Inset showing binding isotherm at 575 nm

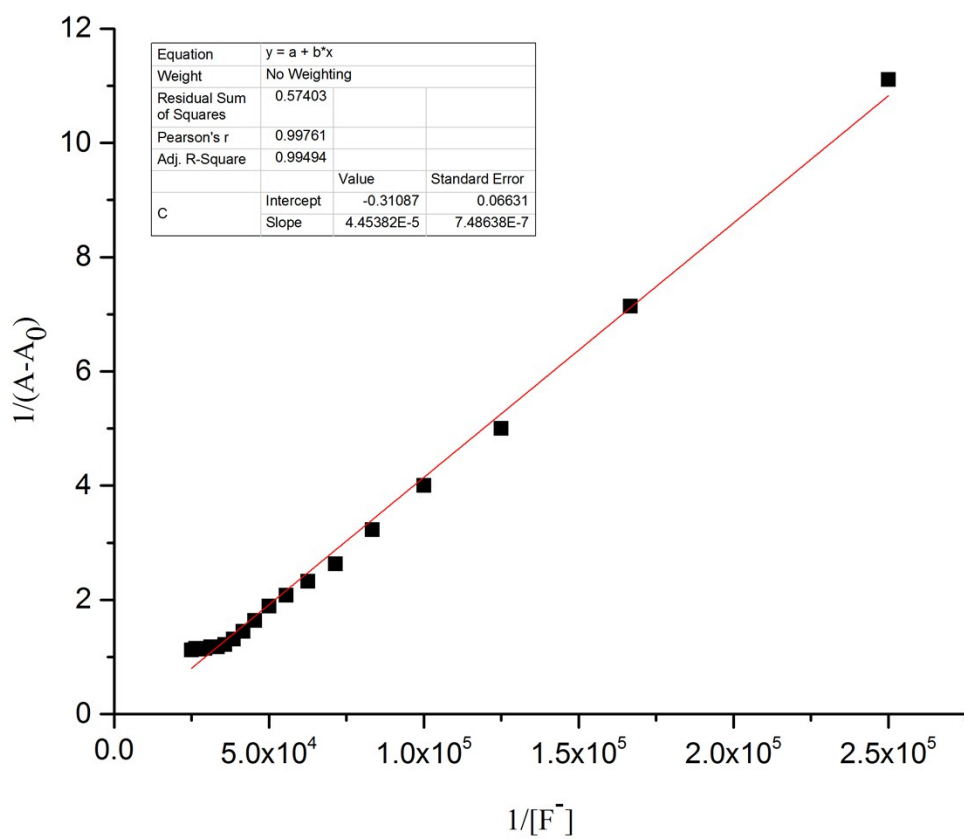

**Fig.S20:** B-H plot of receptor R- Na<sup>+</sup> F<sup>-</sup> complex at a selected wavelength of 575 nm

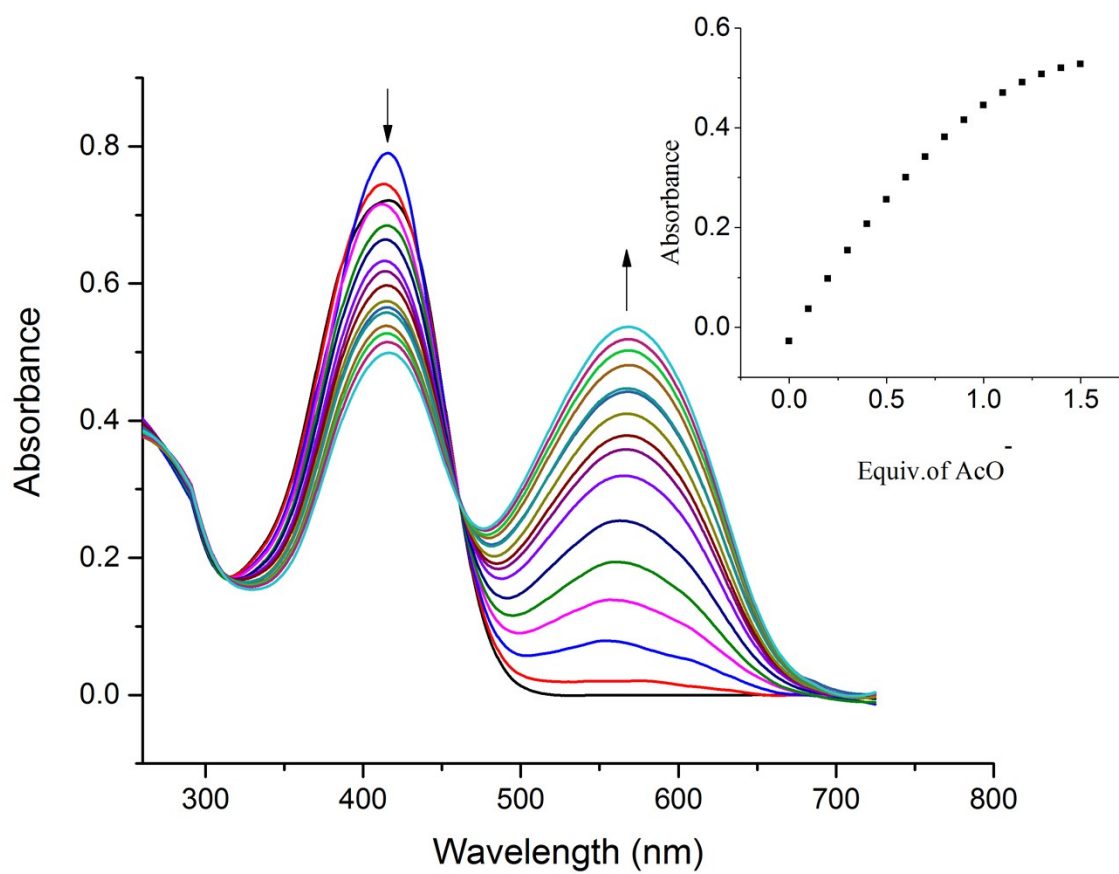

**Fig.S21:** UV-Vis titration spectra of R( $1 \times 10^{-4}$  M, 9:1, v/v DMSO/H<sub>2</sub>O) with the incremental addition of standard solution of NaAcO ( $1 \times 10^{-2}$  M in distilled water). Inset showing binding isotherm at 574nm

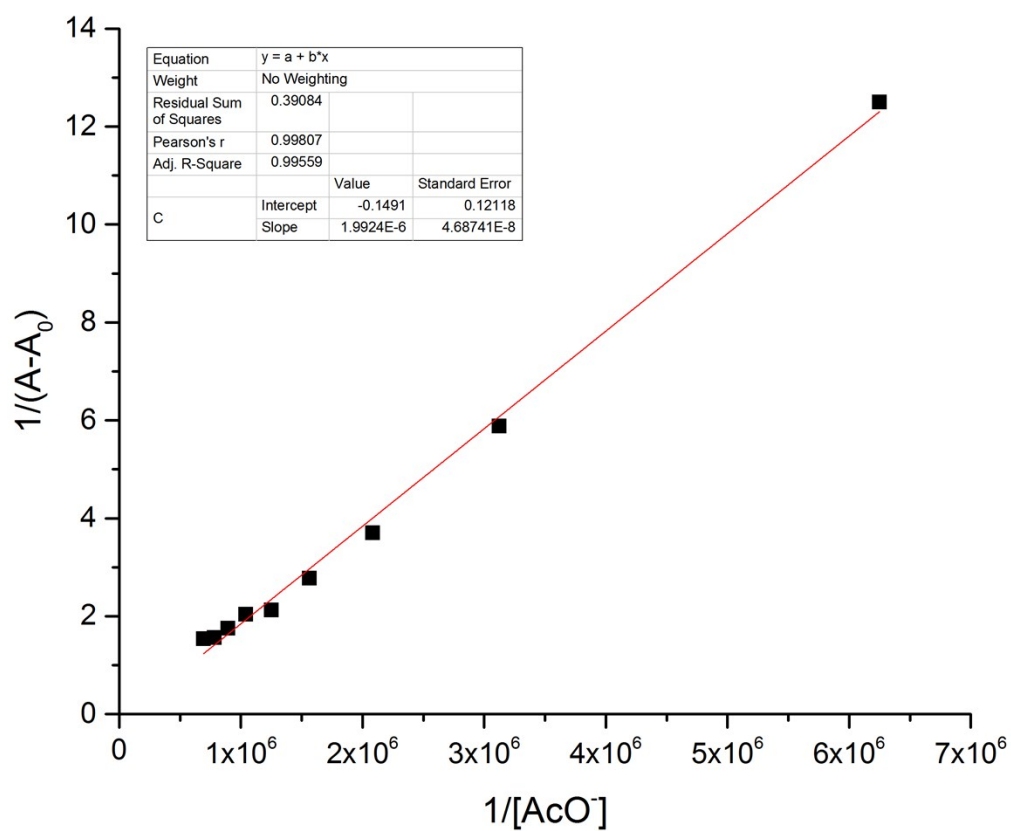

**Fig.S22:** B-H plot of receptor R-  $\text{Na}^+$  AcO complex at a selected wavelength of 574 nm

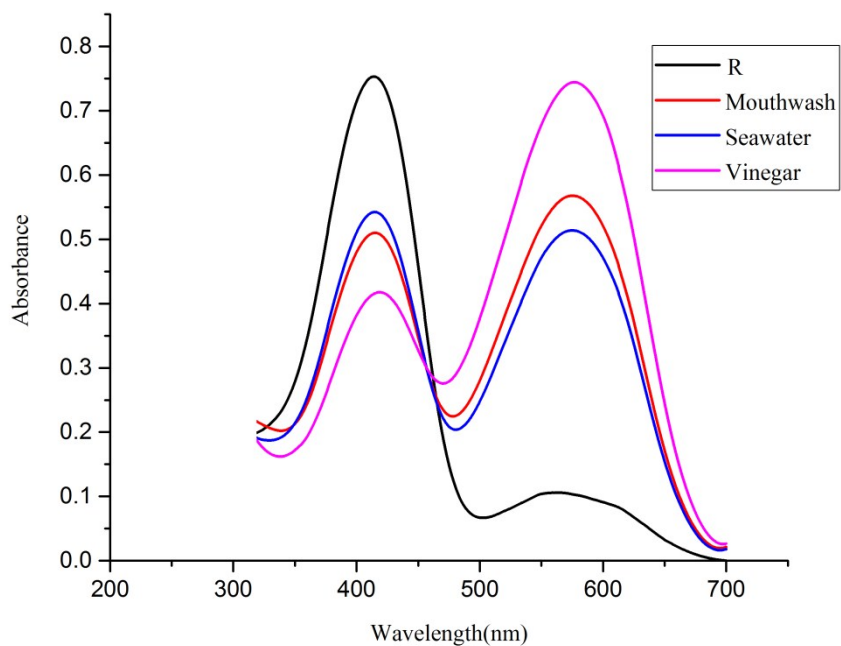

**Fig.S23:** UV-Vis spectra of R ( $1 \times 10^{-4}$  M in DMSO) upon addition of a drop of mouthwash, seawater and vinegar

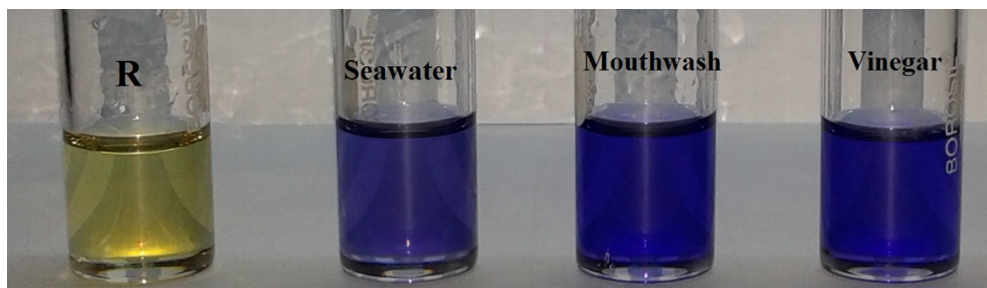

**Fig.S24:** Color change of R ( $1 \times 10^{-4}$  M in DMSO) upon addition of a drop of mouthwash, seawater and vinegar

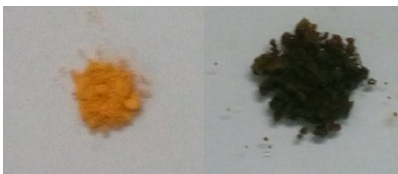

**Fig.S25:** Color change of Receptor R upon dry grinding of receptor with 1 eq. of TBAAcO ; R alone (left), R+ TBAAcO (right)

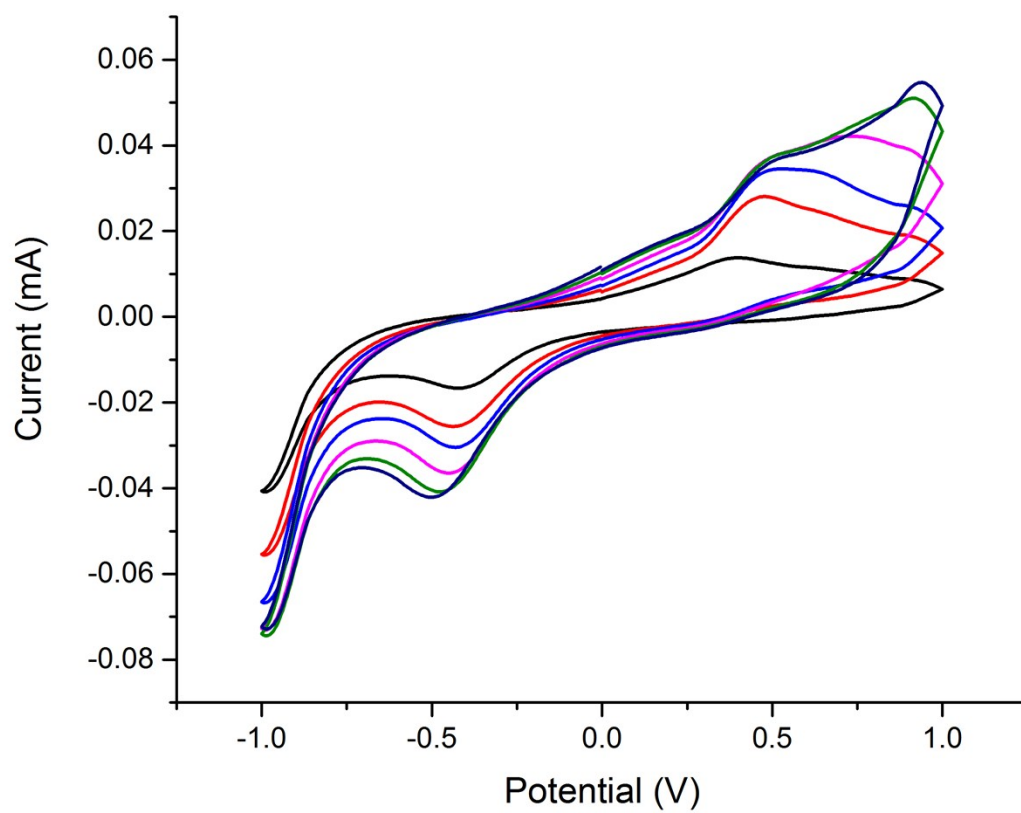

**Fig.S26:** Cyclic voltammogram of Receptor R ( $5 \times 10^{-5} \text{M}$ ) with incremental addition of TBAAcO ion (0-1 equiv.)

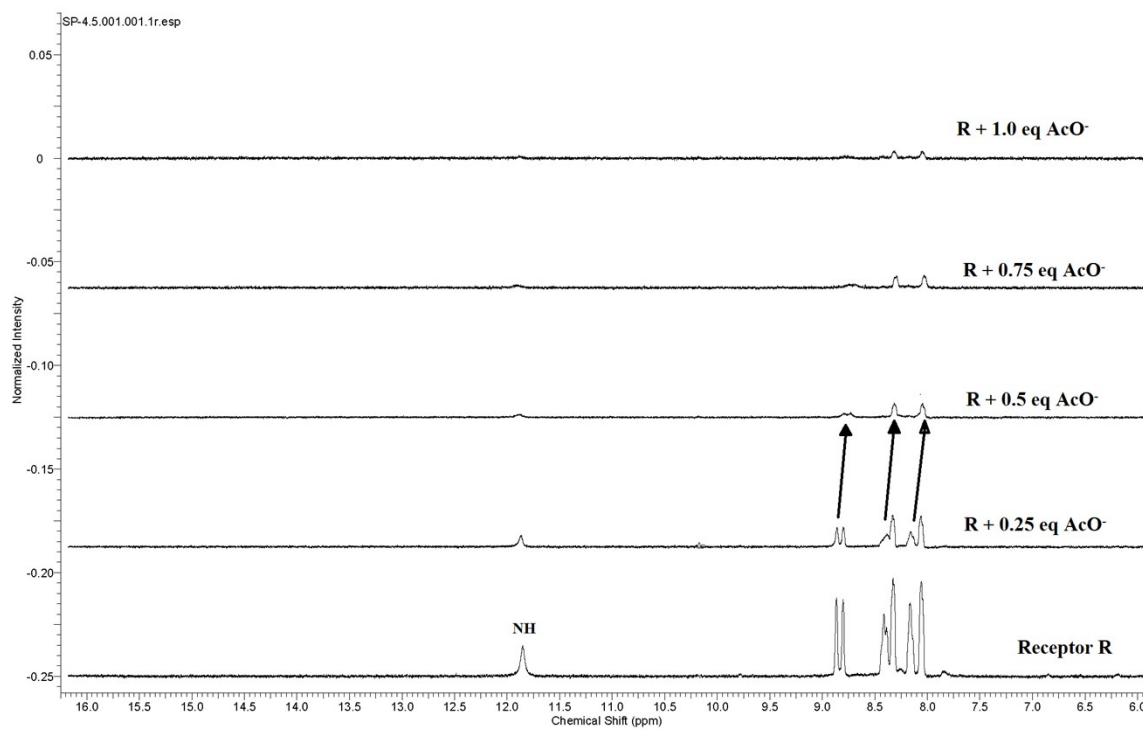

**Fig. S27:**  $^1\text{H}$  NMR titration of receptor R with incremental addition of TBAcO ion (0-1 eq.)

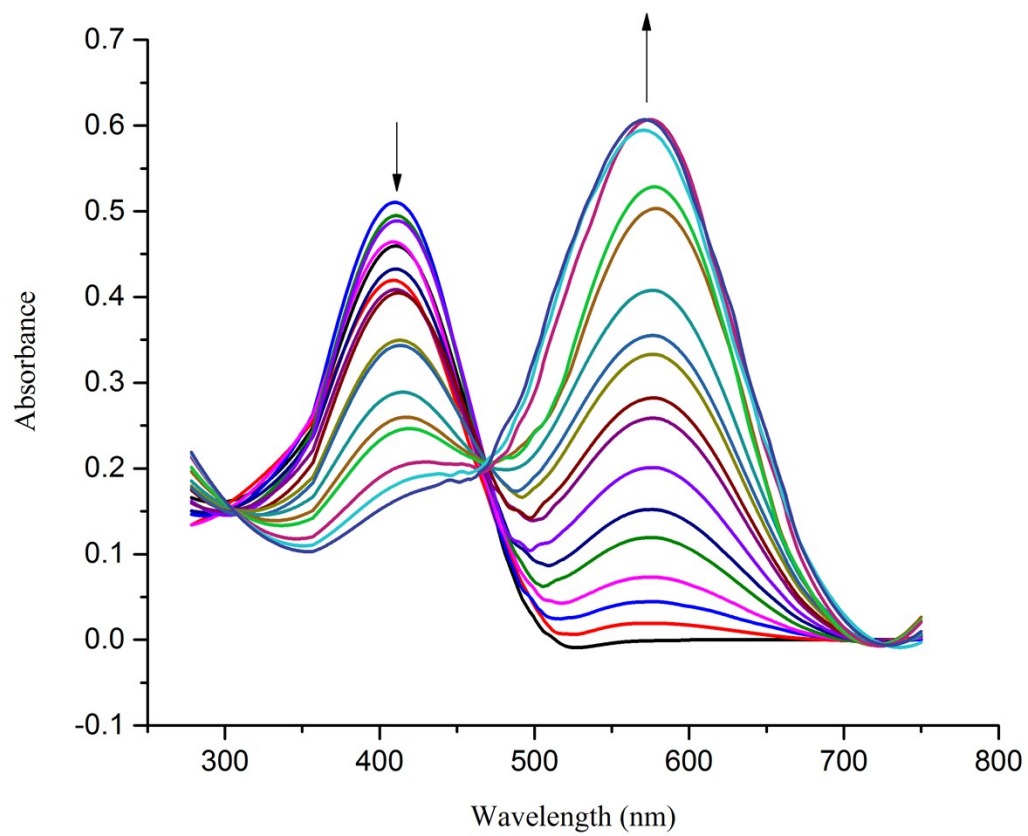

**Fig. S28:** UV-Vis titration spectra of R( $1 \times 10^{-4}$  M, DMSO) with the incremental addition of standard solution of TBAOH ( $1 \times 10^{-2}$  M in DMSO)

### Calculation of binding constant:

Binding constant has been calculated using B-H equation<sup>4</sup> (Eq.1).

$$1/(A-A_0) = 1/(A_{\max} - A_0) + 1/K [F^-]^n (A_{\max} - A_0) \text{ ----- (Eq.1)}$$

Where,  $A_0$ ,  $A$ ,  $A_{\max}$  are the absorption considered in the absence of  $F^-$ , at an intermediate, and at a concentration of saturation.  $K$  is binding constant,  $[F^-]$  is concentration of  $F^-$  ion and  $n$  is the stoichiometric ratio.

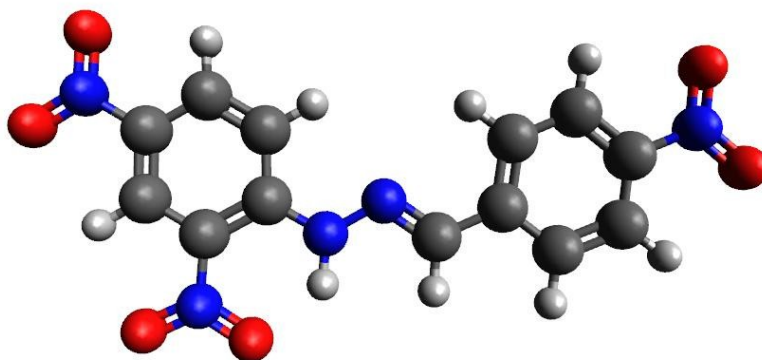

Fig. S29: Optimized geometry of the receptor in gas phase

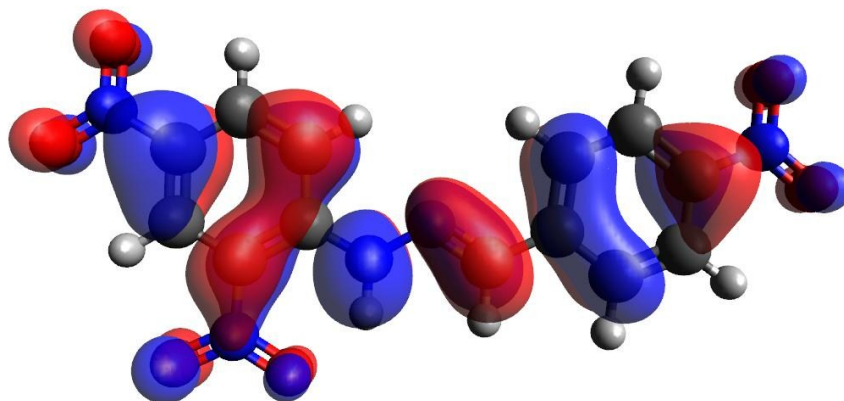

**Fig. S30: HOMO of the receptor in gas phase**

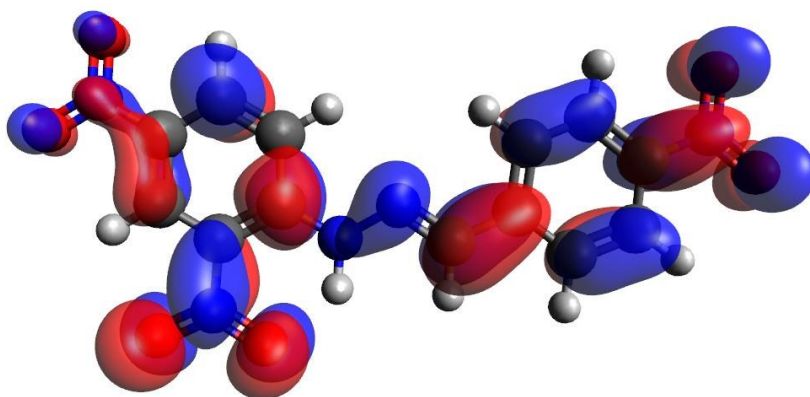

**Fig. S31: LUMO of the receptor in gas phase**

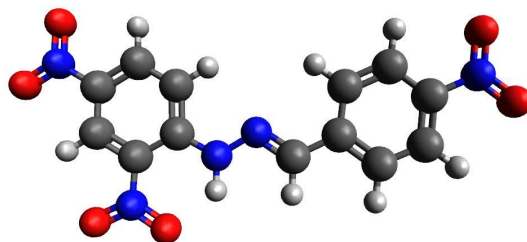

**Fig. S32: Optimized structure of the receptor in DMSO**

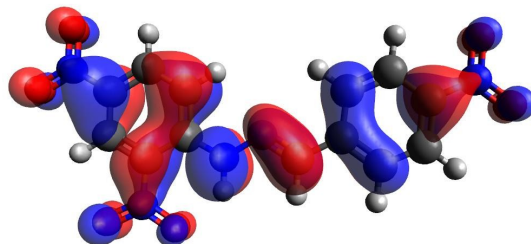

**Fig. S33: HOMO of the receptor in DMSO**

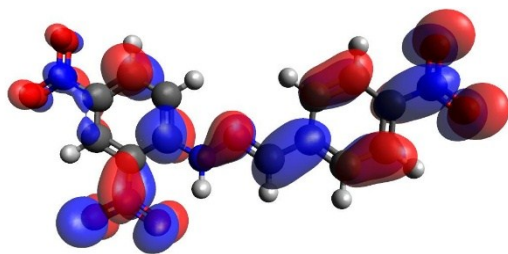

**Fig. S34: LUMO of the receptor in DMSO**

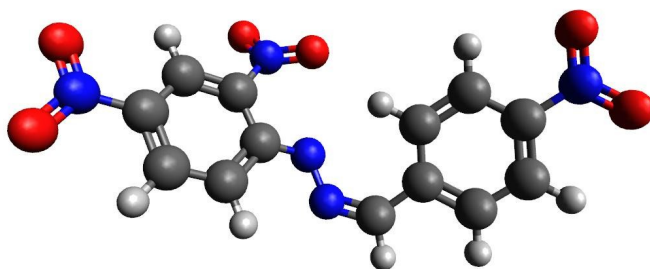

**Fig. S35: Optimized structure of the deprotonated receptor in acetone**

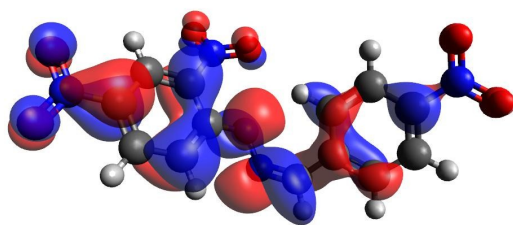

**Fig. S36: HOMO of the deprotonated receptor in acetone**

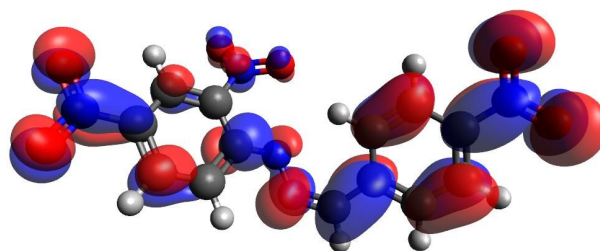

**Fig. S37:** LUMO of the deprotonated receptor in acetone

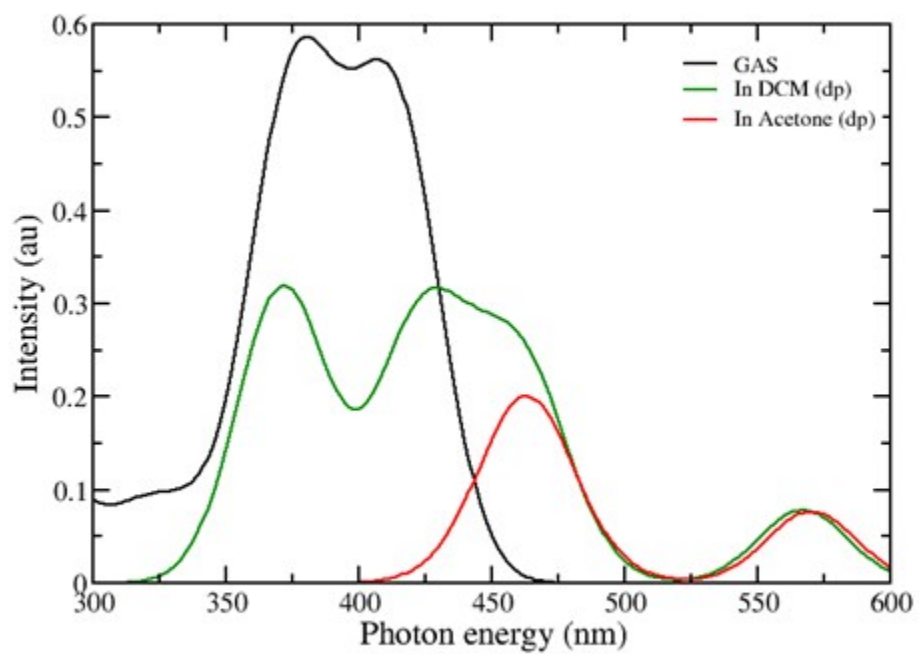

**Fig. S38:** UV-Vis spectra of the receptor in gas phase, in solvents such as DCM and acetone with addition of  $\text{AcO}^-$  ion

**Table S1:** Changes in absorption maxima of receptor R in various solvents upon addition of 1eq. of TBAAcO in dry DMSO

| Solvent           | Dielectric constant | $\lambda_{\max}$ (nm) |
|-------------------|---------------------|-----------------------|
| 1,4-dioxane       | 2.21                | 553                   |
| Tetrahydrofuran   | 7.58                | 587                   |
| Dichloromethane   | 8.93                | 564                   |
| Acetone           | 20.70               | 569                   |
| Acetonitrile      | 37.50               | 563                   |
| Dimethylsulfoxide | 46.80               | 576                   |

**Table S2:** Binding ratio, binding constant and detection limit of receptor R

| Anion                                                           | Media                              | Binding ratio | Binding constant                  | Detection limit (ppm) |
|-----------------------------------------------------------------|------------------------------------|---------------|-----------------------------------|-----------------------|
| AcO <sup>-</sup> (TBA <sup>+</sup> )                            | DMSO                               | 1:1           | $5.28 \times 10^4 \text{ M}^{-1}$ | 1.5                   |
| AcO <sup>-</sup> (Na <sup>+</sup> )                             | DMSO:H <sub>2</sub> O<br>(9:1 v/v) | 1:1           | $3 \times 10^4 \text{ M}^{-1}$    | 0.8                   |
| AcO <sup>-</sup> (TBA <sup>+</sup> )                            | DMSO:Tris<br>HCl (9:1 v/v)         | 1:1           | $1.33 \times 10^2 \text{ M}^{-1}$ | 15                    |
| F <sup>-</sup> (TBA <sup>+</sup> )                              | DMSO                               | 1:1           | $1.1 \times 10^2 \text{ M}^{-1}$  | 2.5                   |
| F <sup>-</sup> (Na <sup>+</sup> )                               | DMSO:H <sub>2</sub> O<br>(9:1 v/v) | 1:1           | $4.2 \times 10^4 \text{ M}^{-1}$  | 0.4                   |
| H <sub>2</sub> PO <sub>4</sub> <sup>-</sup> (TBA <sup>+</sup> ) | DMSO                               | 1:1           | $3.15 \times 10^2 \text{ M}^{-1}$ | 3.3                   |

**Table S3:** Mulliken charge distribution and spin densities derived from DFT calculations

| S.No. | Atom | Atomic charges |          | Atomic charges |          | Spin densities |          |
|-------|------|----------------|----------|----------------|----------|----------------|----------|
|       |      | Gas phase      | DMSO     | DCM            | Acetone  | DCM            | Acetone  |
| 1     | C    | 0.158453       | 0.16084  | 0.920518       | 0.941286 | 0.012169       | 0.014439 |
| 2     | C    | -0.047047      | -1.08816 | -0.63433       | -0.64206 | 0.016148       | 0.014544 |
| 3     | C    | 0.038748       | 0.77922  | 0.305825       | 0.315782 | -0.00678       | -0.00585 |
| 4     | C    | 0.278998       | -0.90151 | -0.26357       | -0.27774 | 0.015779       | 0.014088 |
| 5     | C    | 0.04204        | 0.117055 | 0.029906       | 0.025072 | -0.01167       | -0.01084 |
| 6     | C    | -0.008876      | 0.641967 | 0.758474       | 0.763879 | 0.016737       | 0.015312 |
| 7     | C    | 0.179414       | -0.34923 | -0.60375       | -0.60437 | 0.044722       | 0.039426 |
| 8     | C    | 0.403362       | 0.023445 | -0.2458        | -0.24275 | -0.20273       | -0.19967 |
| 9     | C    | 0.008033       | 0.812116 | 1.175843       | 1.219832 | 0.239271       | 0.239158 |
| 10    | C    | 0.054795       | -0.1579  | 0.203773       | 0.209165 | -0.07132       | -0.07008 |
| 11    | C    | 0.280735       | -0.33983 | -0.20175       | -0.21337 | 0.15687        | 0.155579 |
| 12    | C    | 0.025901       | 0.424902 | 0.39737        | 0.399078 | -0.08735       | -0.08813 |
| 13    | C    | 0.248575       | -0.04609 | -0.76707       | -0.79856 | 0.137724       | 0.135384 |
| 14    | N    | 0.381867       | -0.26395 | -0.24661       | -0.24065 | -0.00059       | -0.00045 |

|    |   |           |          |          |          |          |          |
|----|---|-----------|----------|----------|----------|----------|----------|
| 15 | N | -0.190539 | -0.15194 | 0.272571 | 0.275278 | 0.19691  | 0.203543 |
| 16 | N | 0.380256  | -0.4565  | -0.25026 | -0.25037 | 0.485658 | 0.482539 |
| 17 | N | 0.377313  | -0.28258 | -0.26105 | -0.25462 | -0.00719 | -0.00661 |
| 18 | N | -0.222821 | 0.441835 | -0.31744 | -0.31412 | -0.0093  | -0.00892 |
| 19 | O | -0.391404 | -0.07048 | -0.06206 | -0.06759 | 0.002256 | 0.002106 |
| 20 | O | -0.390718 | -0.06823 | -0.06452 | -0.07098 | 0.002202 | 0.002035 |
| 21 | O | -0.395056 | -0.08055 | -0.06392 | -0.06953 | 0.021514 | 0.022096 |
| 22 | O | -0.392518 | -0.07896 | -0.05798 | -0.06503 | 0.025248 | 0.025941 |
| 23 | O | -0.375782 | -0.00719 | 0.015077 | 0.007395 | 0.019981 | 0.020152 |
| 24 | O | -0.443727 | -0.05828 | -0.03926 | -0.04504 | 0.003744 | 0.004206 |

## References:

- [1] A.D. Becke, Density-functional thermochemistry .III. The role of exact exchange, J. Chem. Phys. 98 (1993) 5648–5652.
- [2] C. Lee, W. Yang, R.G. Parr, Development of the Colle-Salvetti correlation-energy formula into a functional of the electron density, Phys. Rev. B 37 (1988) 785–789.
- [3] J.P. Perdew, Y. Wang, Accurate and simple analytic representation of the electron-gas correlation energy Phys. Rev. B 45 (1992) 13244–13249
- [4] H. Benesi and H. Hildebrand, J. Am. Chem. Soc., 1948, 71, 2703–2707.
